# Parallel Streams to Interconnected Networks: Organization and Reorganization of Cortical Processing During Visual Perception and Action

1 **Title Page**

2 **Abbreviated title:** From streams to network

3 **Author Names and Affiliations:** Dipanjan Ray, Nilambari Hajare, Dipanjan Roy, Arpan Baner-  
4 jee

5 Cognitive Brain Dynamics Lab, National Brain Research Centre, Manesar, India 122052

6 **Corresponding author email address:** Dipanjan Ray ([dipanjan@nbrc.ac.in](mailto:dipanjan@nbrc.ac.in))

7 **Number of pages:** 34

8 **Number of figures:** 6

9 **Number of Words**

10 **Abstract:** 249

11 **Introduction:** 643

12 **Discussion:** 1233

13 **Conflict of interest statement:** The authors declare no competing financial interests.

14 **Acknowledgments:** We thank Dr. Soibam Shyamchand Singh for his helpful comments on im-  
15 proving the readability of the manuscript, NBRC Core funds and infrastructural support. DR (Ray)  
16 was supported by a Cognitive Science Research Initiative Fellowship (SR/CSRI/PDF-13/2014) from

17 Department of Science and Technology, DR (Roy) was supported by the Ramalingaswami fellow-  
18 ship (BT/RLF/Re-entry/07/2014) and DST-CSRI extramural grant (SR/CSRI/21/2016) and AB  
19 was supported by Ramalingaswami fellowship BT/RLF/Re-entry/31/2011) and Innovative Young  
20 Bio-technologist Award (IYBA), (BT/07/IYBA/2013).

## 21 Abstract

22 Dual stream theory of visual processing posits that two distinct neural pathways of specific functional  
23 significance originate from primary visual areas and reaches the inferior temporal and posterior pari-  
24 etal areas. However, there are several unresolved questions concerning the fundamental aspects of  
25 this theory. For example, is the functional dissociation between ventral and dorsal stream input or  
26 output based? Is the dual stream rigid or adaptable to changes? What are the nature of the interac-  
27 tions between ventral and dorsal streams? We addressed these questions using fMRI recordings on  
28 healthy human volunteers when they perform perception and action tasks involving color, face, and  
29 position stimuli. fMRI scans were repeated after seven practice sessions to investigate the effects  
30 of neuroplasticity. Brain mapping analysis supports an input-based functional specialization and  
31 existence of context-dependent neuroplasticity in dual stream areas. Intriguingly, premotor cortex  
32 activation was observed in position perception task and distributed deactivated regions showing  
33 decrease in BOLD activity during task performance compared to baseline was observed in all per-  
34 ception tasks. Dynamic causal modelling (DCM) analysis of cortical activations and deactivations  
35 during perception tasks indicates that the brain dynamics in dorsal and ventral stream areas could  
36 be interpreted within the framework of predictive coding. DCM analysis also reveals an inhibitory  
37 influence from dorsal to ventral stream regions while performing goal-directed action. Effectively,  
38 the network level findings point towards the existence of more intricate context-driven functional  
39 networks selective of "what" and "where" information processing and likely breakdown of the parallel  
40 architecture underlying processing of visual information.

## 41 Significant Statement

42 The present work addressed several gaps in the visual dual stream theory. The study supported  
43 an input-based functional specialization in the dual stream, however, the dominant dual stream  
44 theories could not explain the pattern of BOLD activations and deactivations in entirety. Using  
45 network metrics we could establish the mechanism of predictive coding as a guiding principle to

46 interpret the brain dynamics in dorsal and ventral stream areas. Effective connectivity analysis  
47 during action tasks revealed the inhibitory influence of dorsal areas on to ventral stream processing  
48 and demonstrated that this influence consolidated over training. Overall, the study pointed towards  
49 the existence of more intricate context-driven functional networks and likely breakdown of the  
50 parallel architecture underlying processing of visual information.

## 51 Introduction

52 The existence of two distinct streams of neural information processing- ventral and dorsal, projecting  
53 from the primary visual cortical areas to the inferior temporal cortex and the posterior parietal  
54 cortex respectively has been a powerful theory for about last 40 years (Mishkin and Ungerleider,  
55 1982; Goodale and Milner, 1992). Similar duplex architecture in information processing associated  
56 with other brain functions e.g., auditory (Romanski et al., 1999), haptic (James and Kim, 2010)  
57 and chemosensory perception (Frasnelli et al., 2012), attention (Vossel et al., 2014), speech (Hickok  
58 and Poeppel, 2007) and language (Saur et al., 2008) have been subsequently proposed. Despite such  
59 importance, several aspects of the visual dual stream theory are still poorly understood, particularly  
60 specific roles of individual brain regions in the dual stream pathways, their interactions with each  
61 other for processing a putative perception/ action task, and functional reorganization of dual stream  
62 with time. We address two prominent issues in the present article.

63 First, there exists diverging predictions from the two most powerful variations of visual dual stream  
64 theory, the Mishkin-Ungerleider (MU) model (Mishkin and Ungerleider, 1982) and the Milner-  
65 Goodale (MG) model (Goodale and Milner, 1992) in terms of functional specialization of the two  
66 streams and their interactions. MU model suggests that the *input* information decides the neural  
67 pathway for processing. Features that help in object identification (“what”) like color, shape, texture  
68 etc. are processed in the occipito-temporal or ventral stream whereas perception of spatial (“where”)  
69 information and spatial (e.g., position, velocity, depth, orientation) take the occipito-parietal or  
70 dorsal stream. In contrast, the MG model suggests that the *output* or the task goal decides the  
71 processing pathway. The ventral stream areas are needed for internal representation (“perception”)  
72 of *both* what and where information whereas the dorsal stream is recruited for processing those *same*  
73 *input information* for guiding visuomotor “actions”. This hypothesis is supported by the observation  
74 that patient DF could insert a card in a slot, which was randomly set at different angles, relative  
75 seamlessly, but was unable to correctly describe or otherwise report the orientation of the slot. While  
76 both MG and MU, models may predict same brain activation in certain situations (Figure 1.(a),(b)),  
77 e.g., ventral stream activation during “perception” of “what” information, nonetheless, the models

78 diverge in activation prediction in situations such as “perception” of “where” information (Figure  
79 1.(c), (d)). Moreover, in some conditions e.g., during “action” task guided by “what” information,  
80 (Figure 1.(e),(f)) both the model anticipate activation in the same brain regions but the underlying  
81 pattern of flow of information between different brain regions differs. Thus, the first objective of  
82 the present work is to critically assess two models of visual dual stream in a single fMRI study.

83 The second objective of the study is to probe upto what extent the dual stream is subjected to  
84 reorganization by learning and familiarity. Longitudinal studies involving patients with visual form  
85 agnosia and optic ataxia resulting from ventral or dorsal stream damage, such as the well-known  
86 patient DF, have often yielded contradictory observations (Schenk, 2006; V.H. and KR., 2008;  
87 Schenk and McIntosh, 2010; Schenk, 2012; Whitwell et al., 2015). For example, Schenk (2012)  
88 reported when haptic feedback was removed DF was unable to insert the card in the target slot  
89 which suggests a dissociation of action and perception is unlikely. Contrary to the earlier report,  
90 Whitwell et al. (2015) reported that even with removal of haptic feedback, DF was able to seamlessly  
91 insert the card in the target slot, essentially emphasizing the dominance of MG model. Since there  
92 is a period of 3 years that elapsed between these two studies, the effects of learning in the same  
93 patient DF cannot be ruled out while interpreting the contrary reports. Therefore, we hypothesize  
94 that parametric control of neuroplasticity introduced in investigations of dual stream dissociation of  
95 action-perception can help in reconciling some of these apparently disparate observations. Moreover,  
96 if developmental changes to the streams can be tracked, they can then be used to conceptualize a  
97 marker to differentiate between normal visuomotor functions and pathological scenarios. Hence, to  
98 explore the effects of neuroplasticity driven by behavioral skill development, we performed successive  
99 brain scans interspersed by a week of training in perception and action tasks.

## 100 **Materials and Methods**

### 101 **Participants**

102 22 right handed healthy volunteers (14 females, 8 males) were included in the study who declared  
103 normal or corrected-to-normal vision with no history of neurological/ neuropsychiatric ailments.  
104 Two of the volunteer's data were excluded due to excessive head movement inside the scanner.  
105 Mean age was 25.35 years (SD =2.796) in the final analysis. Handedness were tested according  
106 to the Edinburgh Inventory. All participants gave written informed consent to the experimental  
107 procedure, the format of which was approved by the Institutional Human Ethics Committee of  
108 National Brain Research Centre (IHEC, NBRC) and in agreement with the Declaration at Helsinki.

### 109 **Experimental Design, Stimuli, and Tasks**

110 We designed an experimental paradigm that aims to reveal the brain activations along ventral and  
111 dorsal processing pathways in context of attributes color, face and position (Figure 2). Two kinds  
112 of tasks were designed:

113 1. *Perception* tasks: Color perception was studied using four different colored filled circles that  
114 were presented one at a time randomly but consecutively and then participant was asked to report  
115 verbally the number of times the target color (red) were presented in a run. Similarly, in face  
116 perception task, four different faces were randomly presented one at a time and the task was  
117 to indicate the number of times a particular target face was presented. In position perception  
118 trials, two black dots were presented in different positions with respect to the central cross in the  
119 screen, and the task was to calculate and report the number of times the two dots were equidistant  
120 from the central cross. In all three kinds of contexts, stimuli were presented at the centre of the  
121 screen. In order to minimize eye movements and cued saccades during position perception tasks,  
122 the location of two black dots were restricted within the foveal vision (3 degrees of visual angle)  
123 of each participant. Visual angle extended by color stimuli and face stimuli were also 3 degrees.  
124 Stimuli were presented using Presentation software (Version 18.0, Neurobehavioral Systems, Inc.,

125 Berkeley, CA; [www.neurobs.com](http://www.neurobs.com)).

126 2. Visually-guided *action* tasks: Participants were asked to move the cursor on the screen with the  
127 help of an fMRI compatible joystick (Current Designs, Inc.; Model HHSC-JOY-5; <http://curdes.com>)  
128 whose movement was calibrated to match the velocity and direction of the cursor movement  
129 to a target stimulus. Red circle, a target face, or the distant black dot from the centre of the screen  
130 were the target stimuli among two dissimilar stimuli of the same category presented simultaneously  
131 (Figure 2).

132 Visual stimuli for both perception and action tasks were presented with a grey background in eight  
133 “On” blocks (duration 24 seconds each) alternating with “Off” blocks of 16 seconds duration (Figure  
134 2). During Off blocks a central cross on a grey background was presented. 8 On and Off blocks (1  
135 run) of each attribute were presented successively. In perception tasks, each stimulus was presented  
136 for one second (with no interstimulus interval) while in action tasks each stimulus persists until  
137 the participants move the cursor to the target location. However, if the participant had failed to  
138 move the cursor to the target within a window of 4s, the next set of visual objects would appear  
139 immediately. For perception tasks, the number of times a target attribute appeared were reported  
140 by participants verbally after the completion 1 run. For action tasks, the number of times the  
141 stimulus appeared within each On block depended on the performance of participants.

142 To assess the effects of learning onto dual-stream visual processing pathways, participants were  
143 trained in the aforementioned tasks for 7 consecutive days in a non-MRI environment following the  
144 first fMRI scan session. Each practice session comprised of same six tasks identical to scanning  
145 sessions but the order of presentation of individual stimuli within a task were randomized for each  
146 of the sessions. The order of six task blocks were also randomized. The number of practice sessions  
147 were decided based on a pilot study probing the improvement of response time with practice. From  
148 eighth days the performance saturated in the pilot sessions.



## 149 **MRI Data Acquisition**

150 Images were acquired on a 3T (Philips Achieva) Magnetic resonance imaging (MRI) scanner at  
151 NBRC using a standard whole head coil (8-channels). To limit head movement related artifacts,  
152 participants were verbally instructed to keep their heads as still as possible. Additionally, the  
153 participant's head was fixed by foam padding. Ear plugs and customized headphones were used to  
154 attenuate scanner noise. The room lights were dimmed at near-identical levels for all participants.

155 *Structural MRI*: High-resolution T1-weighted structural MRI images with repetition time (TR)=  
156 8.4 ms, echo time (TE)=3.7ms, flip angle (FA) = 8 degrees, matrix =  $252 \times 230 \times 170$ , field of view  
157 (FOV) =  $250 \times 230 \times 170$  mm were acquired from each participant for anatomical coregistration.

158 *Functional MRI*: T2\* weighted functional whole-brain images were acquired with TR= 2000 ms,  
159 TE= 35 ms , FA = 90 degrees, matrix =  $60 \times 62 \times 30$ , FOV =  $230 \times 230 \times 179$  mm during each  
160 task performance using a gradient echo-planar imaging (EPI) sequence.

## 161 **Behavioural Data Analysis**

162 For perception tasks, verbal response was sought from participants after each run to report the  
163 number of times the target stimulus were presented. For visually guided action tasks, the response  
164 time (RT) was computed by measuring the time taken by the participant to move the cursor to the  
165 target object after two objects change position. Two way ANOVA was employed to compare RTs  
166 across days and tasks. Post hoc Tukey-Kramer test was also used to compare RTs in all possible  
167 pairs of conditions.

## 168 **Preprocessing and brain activation mapping**

169 The preprocessing and statistical analysis of fMRI data were executed with SPM8 toolbox (Statisti-  
170 cal Parametric Mapping, <http://www.fil.ion.ucl.ac.uk/spm/>). Initial 8 seconds of scanning sequence  
171 were discarded to allow the magnetization to stabilize to a steady state. Prior to statistical analy-  
172 sis, images were slice-time corrected, realigned with the mean image, motion corrected, coregistered  
173 with the corresponding T1-weighted images, normalized to a Montreal Neurological Institute (MNI,

174 <https://www.mcgill.ca/>) reference template and resampled to  $4 \times 4 \times 5 \text{ mm}^3$ . During motion cor-  
175 rection 2nd degree B-Spline interpolation was employed for estimation and 4th degree B-Spline for  
176 reslicing. Coregistration used mutual information objective function while normalization used 4th  
177 degree B-Spline interpolation. Temporal high pass filtering with cut off of 128 seconds was employed  
178 to remove low frequency drifts caused by physiological and physical (scanner related) noises. Images  
179 were smoothed with a full-width at half-maximum (FWHM) Gaussian kernel  $8 \times 8 \times 10 \text{ mm}^3$ .

180 The general linear model (GLM) based one-sample t test was employed to identify brain activa-  
181 tions and deactivations (Friston et al., 1994). The design matrix included regressors of interest for  
182 each task representing the event onsets and their time course as well as realignment parameters  
183 for head movement as regressors of no interest. The resulting statistical parametric maps of the  
184 t-statistics for contrast *Task – Baseline* were thresholded at  $p < 0.01$  (False Discovery Rate: FDR  
185 corrected) to get the activated voxels at each participant-level across the whole brain. Group anal-  
186 yses were performed using a random effects model. Deactivated voxels during tasks were identified  
187 by implementing a GLM with contrast *Baseline – Task* and repeating the aforementioned steps.  
188 Anatomical localization of local maxima of activation / deactivation was assessed using the SPM  
189 Anatomy toolbox (v 2.2b, Eickhoff et al. 2005).

190 Subsequently, we were interested in tracking the number of activated/ deactivated voxels as well as  
191 the percentage signal change in dual stream areas between two scanning sessions interspersed with  
192 practice sessions. V1-V2 mask was created by combining BA17 and BA18 masks, ventral stream  
193 (VEN) mask by combining ventral extrastriate cortex, lateral occipital cortex, and gyrus fusiformis  
194 and dorsal stream (DOR) mask by combining dorsal extrastriate cortex, V5/MT+, inferior parietal  
195 cortex, intraparietal sulcus, and superior parietal cortex. Probabilistic cytoarchitectonic maps from  
196 SPM Anatomy toolbox (Eickhoff et al., 2005) were used as masks for ROI computation. Comparison  
197 between 2 scanning sessions were done Wilcoxon signed rank test.

## 198 **Dynamic causal modeling**

199 A deterministic bilinear variant of Dynamic causal modelling (DCM) (Friston et al., 2003) was em-  
200 ployed to probe the effective connectivity among the activated / deactivated regions. Alternative  
201 models were compared by Bayesian model selection, that rests on computing the model evidence,  
202 i.e., the probability of the data (BOLD signal) given a specific model. The posterior probabilit-  
203 ity of coupling parameters is estimated by Bayesian Model Averaging (BMA), where we average  
204 over models, weighted by posterior probability of each model. Effective network models were con-  
205 structed for activation and deactivation separately in each hemisphere in the region of interests  
206 (ROI). Different network schemas involving primary visual cortex (V1), ventral extrastriate areas  
207 (VES), fusiform gyrus (FG), dorsal extrastriate areas (DES), superior parietal lobule (SPL), pre-  
208 motor cortex (PMC), and motor cortex (Mot) as ROIs were chosen as nodes of "activation" and  
209 "deactivation" networks in a respective task category.

210 *Time series extraction:* Time series for DCM analysis were extracted by taking the first principal  
211 component of the time series from all voxels included in a sphere of 6 mm diameter centered on  
212 the peak activated voxel in each participant. We also adjust data for "Effects of interest" thus  
213 effectively mean-correcting the time series.

214 *Model space construction:* DCMs for activation networks in color and face perception tasks included  
215 bilateral intrinsic connectivity between primary visual cortex (VIS) and extrastriatal ventral stream  
216 (VES), as well as between VES and fusiform gyrus (FG) and no direct intrinsic connectivity between  
217 VIS and FG. The recurrent or self connections were also considered (Figure 3(a)). Two kinds of  
218 model families were considered, in both of which visual inputs enter the system via primary visual  
219 cortex. However, in model 1, only the feed-forward connections, i.e., from VIS to VES and from  
220 VES to FG are modulated, whereas in model 2 both feed-forward and feedback connections including  
221 from FG to VES and from VES to VIS are modulated. Analogously, DCMs for activation networks  
222 during position perception involved SPL and PMC. Here, two alternative models have bilateral  
223 intrinsic connectivity between both nodes and self connections and inputs enter the system at SPL  
224 (Figure 3(c)). In model 1, only the causal connections from SPL to PMC is modulated whereas in

225 model 2 connections are modulated in both directions. DCMs for deactivation networks (observed  
226 for perception tasks only) have bidirectional intrinsic connectivity among nodes in the immediate  
227 hierarchy (V1-DES and DES-SPL) and self connections simultaneously (Figure 3(b)). Out of the  
228 two models tested, model 1 had only the self connections modulated whereas in model 2, input  
229 enters the system via SPL and all other top down connections (SPL  $\rightarrow$  DES, DES  $\rightarrow$  VIS) are  
230 modulated by the tasks.

231 Only activation networks are relevant for action tasks and we consider models consisting of four  
232 ROIs - V1, FG (ventral stream area), SPL (dorsal stream area) and motor cortex (Figure 3(d)). In  
233 all models visual inputs enters the models via primary visual cortex. All the nodes are intrinsically  
234 connected among each other except primary visual cortex and motor cortex between which there is  
235 no direct intrinsic connection. We consider modulation of all non-self connections between nodes.  
236 A “full” model in which all non-self connections are modulated is represented in Figure 3(d). Other  
237 models are constructed based on modulation of combinations of effective connections between four  
238 nodes. One such model with modulation of 5 connections is also shown in the same figure. In total,  
239 80 models were evaluated for model evidence computation.

## 240 Results

### 241 Behavioral performance and effects of practice

242 All participants were 100 % accurate in counting the number of target stimuli that were presented  
243 in each block during perception tasks, during both scanning sessions and for the 7 practice sessions.  
244 Response times (RT) were computed trial-by-trial in visually guided action tasks (Figure 4). Two  
245 way ANOVA on RT with task category (color, face, or position action) and training days as variable  
246 shows significant main effect of both practice,  $p < 0.0001$  (deg of freedom = 8), and task condition  
247  $p < 0.0001$  (deg of freedom = 2), on RT with no significant interaction effect,  $p = 0.5004$  (deg of  
248 freedom = 16). In general, color action shows the fastest and position action the slowest response  
249 time. Compared to last practice session, Response time deteriorates in 2nd fMRI scan. Post-

250 hoc analysis with Bonferroni multiple comparison revealed that RT in 2nd fMRI scan session is  
251 significantly faster than RT in 1st fMRI scan session ( $p=0.0029$ ).

## 252 **Mapping functional brain activity along dual stream: SPM results**

### 253 **Activation and deactivation of dorsal and ventral visual areas in perception tasks**

254 Significant activations were observed along primary visual areas (V1 and V2) and along the ventral  
255 stream, V3v, V4v, lateral occipital complex (LOC), and fusiform gyrus (FG) during color and face  
256 perception tasks for both scanning sessions, day 0 (scan 1) and day 8 (scan 2), separated by 7  
257 practice days (Figure 5, Table 1).

258 In position perception task (Figure 5, Table 1), bilateral ventral(e.g, V4v, LOC, FG) , and dorsal  
259 (e.g.,V5/MT, SPL ) stream regions were activated for both scan 1 and 2. Bilateral premotor cortex  
260 (PMC) also show activation in both the scans. Interestingly, primary and secondary visual cortices  
261 did not exhibit activations in either scan at the FDR-corrected group level analysis.

262 Subsequently, the outcome of Wilcoxon signed ranked tests performed for number of activated/  
263 deactivated voxels were reported in Table 2 (detailed descriptions for each scanning session is pre-  
264 sented in extended data 2-1). Similarly, results from Wilcoxon signed ranked tests performed on  
265 the percentage signal change comparisons between scan 1 and scan 2 were presented in Table 3  
266 (individual percentage signal changes in each scan sessions are reported in extended data 3-1). A  
267 general trend of decrease in the extent of activation in ventral and dorsal stream in all perception  
268 tasks emerges from comparisons between scan 1 and 2. However, percentage signal change between  
269 scanning sessions rarely changed.

270 Intriguingly, all perception tasks showed distinct areas of deactivation (relative to control block) at  
271 the group level (Figure 5,Table 1). The deactivated areas predominantly involved bilateral primary  
272 and secondary visual cortices, and dorsal stream regions (extrastriate dorsal stream, superior parietal  
273 lobule). Certain ventral stream regions such as extrastriate ventral stream and fusiform gyrus also  
274 show some deactivation. Compared to activated areas in perception (and response) tasks, the  
275 deactivated areas are located more medially. In contrast to activation, there were no statistically

276 significant change in the extent of deactivation between scan 1 and scan 2 (except dorsal stream  
277 deactivation in face perception) (Table 2, 2-1).

### 278 **Activation of dorsal and ventral stream areas in action tasks**

279 In all action tasks (Figure 5, Table 1) primary and secondary visual cortices, ventral and dorsal  
280 stream areas and motor cortex undergo bilateral activation in both scan 1 and 2. There is a decrease  
281 in the extent of activation, however, the statistically significant decrease during scan 2 predominantly  
282 occurs in the right hemisphere (Table 2, 2-1). Analogous to perception tasks, percentage signal  
283 change does not show significant change with practice in scan 2 (Table 3, 3-1) compared to scan 1.  
284 Unlike perception tasks, there is no significant deactivation in any of the action tasks, in both scan  
285 1 and 2.

### 286 **Brain network analysis**

287 After identifying activation and deactivation of several brain regions in perception task and primarily  
288 activation in those regions during action task, we tried to underpin the effective connectivity between  
289 these regions across tasks, and their alteration with practice. To address these systematically, we  
290 employ Dynamic causal modelling (DCM) to evaluate effective brain networks underlying perception  
291 and action tasks according to the scenarios proposed in Fig 3.

### 292 **Perception tasks**

293 DCM was applied to evaluate the intricate causal relationships in the "activation" and "deactivation"  
294 networks among the participants (see Methods for details) with primarily two classes of models being  
295 tested. Model 1 represented bottom-up sensory driven processing circuit for activation networks  
296 and self-modulating network nodes for deactivation networks. On the other hand, model 2 always  
297 represented a network scheme that involves top-down information transfer with or without the  
298 bottom-up processing.

299 For activation networks during color, face and position perception, model 2 schemas are more likely  
300 candidates that facilitate the underlying information processing (see Figure 6 a and b). Subse-

301 quently, on parameter estimation (see Figure 6-2), all the feed-forward connections among activated  
302 regions were found to be positive whereas feedback connections were negative. Scan 1 and scan 2  
303 had same pattern of causal interactions along with similar strength of effective connections.

304 DCM on the time series from deactivated brain areas also favor model 2. The input to SPL was  
305 found to be inhibitory whereas the coupling parameter of feedback connections between deactivated  
306 regions were estimated to be positively modulated during each perception tasks, across scanning  
307 sessions 1 and 2.

### 308 **Effective connectivity in action tasks**

309 DCM analysis of *action* tasks required comparison among 80 different models (Fig 3 d). On esti-  
310 mating the coupling parameters, we found that primary visual cortex positively influences ventral  
311 and dorsal regions as predicted by dual stream theory in all action tasks (see Figure 6 c-h). Both  
312 the ventral region (FG) and dorsal region (SPL), in turn, positively influence the motor cortex to  
313 perform the visually guided actions tasks cued with face and color stimuli. In position action tasks,  
314 motor cortex is driven by FG but not SPL, whereas in color-cued and face-cued action tasks before  
315 practice motor cortex is driven by SPL. The feedback connections (FG → V1, SPL → V1, MOT →  
316 FG, MOT → SPL), when present, are all inhibitory. There is also strong inhibitory influence from  
317 dorsal stream regions to ventral stream regions while performing the movement and this inhibitory  
318 influence either remains same (for position action task) or is enhanced (for color and face action)  
319 with practice as reflected in the estimated coupling parameters.

## 320 **Discussion**

321 Our study aimed to investigate the subtle variants of visual dual stream theory proposed by Mishkin-  
322 Ungerlieder (MU) (Mishkin and Ungerleider, 1982; Mishkin et al., 1983) and Milner-Goodale (MG)  
323 (Goodale and Milner, 1992; Milner et al., 2012), on a task ideally designed to validate their re-  
324 spective predictive power in understanding and interpreting patterned brain activity. Accordingly  
325 we conceptualized two kinds of tasks - one that involved perception of visual objects (*perception*

326 tasks), e.g., color, face or position stimuli in absence of any motor goal and the other which required  
327 performance of goal directed movements (*action* tasks) with a joy-stick following color, face or po-  
328 sition cues. MU model would predict only dorsal stream activations for position stimuli but ventral  
329 stream activations for color and face stimuli in perception tasks. On the other hand, MG model  
330 would predict the involvement of only ventral areas in all perception tasks. Intriguingly, we see both  
331 dorsal and ventral stream activations in position perception tasks, an observation that diverges from  
332 predictions of both the models. Secondly, we observed patterned deactivation in dorsal and ventral  
333 stream brain regions for color/ face and position stimuli respectively. Thirdly, the activation and  
334 deactivation in perception and action tasks showed changes in the pattern depending on the con-  
335 text of the tasks. Fourthly, using dynamic causal modelling (DCM) (Friston et al., 2003) we could  
336 demonstrate how predictive coding may be relevant for understanding the role of top-down modula-  
337 tions in higher order visual areas during perception-action tasks and how “cross-stream” inhibitory  
338 influences are exerted by dorsal stream regions onto ventral stream areas during action tasks. With  
339 training, the inhibitory influences either remain same or get consolidated to an unidirectional dorsal  
340 to ventral influence. Recently, increasing evidence have shown that the ventral and dorsal streams  
341 are not strictly independent, but do interact with each other directly (for a review see van Polanen  
342 and Davare (2015)). However, this is the first study, to the best of our knowledge, to point out that  
343 the nature of dorsal to ventral influence may be inhibitory and demonstrate the evolution of such  
344 interactions with training. Based on all these observations, we propose a revision of stream-based  
345 models to a more nuanced network-level understanding of visual information processing that show  
346 context-dependent neuroplasticity over time.

347 BOLD deactivation is relatively a rarely discussed topic and often looked upon with suspicion by  
348 the neuroimaging community. More often than not it is explained by the so-called “blood stealing”  
349 effect - redirection of blood flow to the activated region and away from adjacent inactive regions,  
350 and routinely ignored (Wade, 2002; Hayes and Huxtable, 2012). Nonetheless, the deactivation found  
351 during the perception tasks in the present study is consistent across tasks and practice sessions, is  
352 much more extensive compared to the activation (at least in color and face perception), and includes  
353 too many distal regions than the activated areas to share a common pool of blood supply. Thus,



354 neuronal suppression is a more probable explanation for the deactivations we observed in this study  
355 in contrast to blood stealing ([Frankenstein et al., 2003](#)).

356 The decrease in the number of activated voxels in perception and action tasks with practice reflects  
357 the habituation effect, a form of neuroplasticity marked by the progressive decrease of the responses  
358 to repeated sensory stimulation ([Glaser and Whittow, 1953](#)). In action tasks, the lateralization of  
359 contraction of activated regions denotes that the habituation in dual stream is dependent on context  
360 e.g., right-handedness of the participants in the present study. Preservation of overall activation  
361 pattern, constancy of percentage signal change in the face of contraction and lowering of reaction  
362 time supports the idea that habituation effectuates a more efficient processing of information which  
363 consumes a lesser amount of energy reflected by a decrease in the spatial boundaries of activation  
364 patterns ([Kok et al., 2012](#)).

365 The predictive coding framework, an emerging theory of brain function, suggests that the brain  
366 is continually attempting to predict the external causes of sensory information at all levels of the  
367 cortical processing hierarchy ([Mumford, 1992](#); [Rao and Ballard, 1999](#); [Friston and Kiebel, 2009](#)).  
368 According to the most recent variation ([Friston and Kiebel, 2009](#)) of this view, feedback connections  
369 from a higher- to a lower-order sensory cortical area carry predictions of lower-level neural activities  
370 and inhibit/explain away the predicted signal in the lower level. The residual error, if any, is carried  
371 by the feed-forward connections, which is excitatory in nature, and which updates the prediction at  
372 the higher level. This process continues until prediction matches the incoming stimuli. This view  
373 represents a more computationally efficient alternative to traditional model of sensory processing  
374 where each feature of the sensory object is processed and integrated in a predominantly bottom  
375 up direction. In other words, lower order areas act as filter to ignore redundancy in signal based  
376 on a prediction code. In our present study, we found feed-forward connections among activated  
377 regions in perception tasks to be contributing towards excitatory "influences" while feedback con-  
378 nections contributing to inhibitory "influences" (see Figure 6(a)) thus complying with the variation  
379 of predictive coding theory proposed by [Friston and Kiebel \(2009\)](#).

380 Similarly, neural suppression in dorsal stream in perception tasks were found to be mediated by

381 top-down inhibitory influence. A possible explanation of deactivation in dorsal stream is repeti-  
382 tion/expectation suppression (RS or ES) (Meyer and Olson, 2011; Grill-Spector et al., 2006) as in  
383 all perception tasks stimuli were presented centrally in the same location. As the stimuli location  
384 is fully predictable, there is no feedforward prediction error. On the other hand, as the subject  
385 concentrate to perceive the stimuli, the top-down inhibitory influence of prediction increases during  
386 active blocks. Thus resulting in overall deactivation compared to rest blocks. This explanation  
387 of prediction/repetition suppression which is based on predictive coding and is supported by our  
388 analysis contradicts a more traditional explanation that bases on local mechanisms such as fatigue  
389 (Grill-Spector et al., 2006) that can be represented self-inhibiting loops to a neuronal population so  
390 that the inhibition is proportional to the neuronal activity ( DCM 2 in our analysis).

391 The DCM analysis shows a consistent inhibitory influence of SPL to FG during action tasks. There  
392 is already a few papers emphasizing the interaction between ventral and dorsal stream during task  
393 performance (Himmelbach and Karnath, 2005; van Polanen and Davare, 2015). However, to our  
394 knowledge, this is the first work to point out the nature of dorsal to ventral influence to be inhibitory.  
395 The interaction between two streams also lends support to the conceptualization of visual brain as a  
396 network ( for a review see Schenk and McIntosh (2010) ) as opposed to two functionally independent  
397 streams.

398 Interestingly, the strengthening of the inhibitory influence over practice corresponds to the improve-  
399 ment of the response time in action tasks. However, to ascertain the exact role of this inhibitory  
400 influence, and the reason behind its strengthening would be merely speculative at this stage and must  
401 be left as the questions for future research. Electrophysiological study (including micro-electrode  
402 recordings from primate) could provide insight into the neurophysiological basis of the inhibitory  
403 influence by exploring the temporality of ventral and dorsal stream activity. Transcranial magnetic  
404 stimulation (TMS) study could be explored as an alternative approach in human participants. Spe-  
405 cific brain regions in ventral or dorsal stream could be stimulated while performing visuomotor tasks  
406 and its effect on the behavior (response time, accuracy) could be studied in the near future.

## 407 References

- 408 Eickhoff, S. B., Stephan, K. E., Mohlberg, H., Grefkes, C., Fink, G. R., Amunts, K., and Zilles, K.  
409 (2005). A new SPM toolbox for combining probabilistic cytoarchitectonic maps and functional  
410 imaging data. *NeuroImage*, 25(4):1325–1335.
- 411 Frankenstein, U., Wennerberg, A., Richter, W., Bernstein, C., Morden, D., Rémy, F., and McIntyre,  
412 M. (2003). Activation and deactivation in blood oxygenation level dependent functional magnetic  
413 resonance imaging. *Concepts in Magnetic Resonance*, 16A(1):63–70.
- 414 Frasnelli, J., Lundström, J. N., Schöpf, V., Negoias, S., Hummel, T., and Lepore, F. (2012). Dual  
415 processing streams in chemosensory perception. *Frontiers in human neuroscience*, 6:288.
- 416 Friston, K. and Kiebel, S. (2009). Predictive coding under the free-energy principle. *Philosophical*  
417 *Transactions of the Royal Society B: Biological Sciences*, 364(1521):1211–1221.
- 418 Friston, K. J., Harrison, L., and Penny, W. (2003). Dynamic causal modelling. *NeuroImage*,  
419 19(4):1273–302.
- 420 Friston, K. J., Holmes, A. P., Worsley, K. J., Poline, J.-P., Frith, C. D., and Frackowiak, R. S. J.  
421 (1994). Statistical parametric maps in functional imaging: A general linear approach. *Human*  
422 *Brain Mapping*, 2(4):189–210.
- 423 Glaser, E. M. and Whittow, G. C. (1953). Evidence for a non-specific mechanism of habituation.  
424 *The Journal of physiology*, 122(Suppl):43–4P.
- 425 Goodale, M. a. and Milner, A. (1992). Separate visual pathways for perception and action. *Trends*  
426 *in Neurosciences*, 15(1):20–25.
- 427 Grill-Spector, K., Henson, R., and Martin, A. (2006). Repetition and the brain: neural models of  
428 stimulus-specific effects. *Trends in Cognitive Sciences*, 10(1):14–23.
- 429 Hayes, D. J. and Huxtable, A. G. (2012). Interpreting deactivations in neuroimaging. *Frontiers in*  
430 *psychology*, 3:27.

- 431 Hickok, G. and Poeppel, D. (2007). The cortical organization of speech processing. *Nature reviews*.  
432 *Neuroscience*, 8:393–402.
- 433 Himmelbach, M. and Karnath, H.-O. (2005). Dorsal and Ventral Stream Interaction: Contributions  
434 from Optic Ataxia. *Journal of Cognitive Neuroscience*, 17(4):632–640.
- 435 James, T. W. and Kim, S. (2010). Dorsal and Ventral Cortical Pathways for Visuo-haptic Shape  
436 Integration Revealed Using fMRI. In *Multisensory Object Perception in the Primate Brain*, pages  
437 231–250. Springer New York, New York, NY.
- 438 Kok, P., Jehee, J., and deBrLange, F. (2012). Less Is More: Expectation Sharpens Representations  
439 in the Primary Visual Cortex. *Neuron*, 75(2):265–270.
- 440 Meyer, T. and Olson, C. R. (2011). Statistical learning of visual transitions in monkey inferotemporal  
441 cortex. *Proceedings of the National Academy of Sciences*, 108(48):19401–19406.
- 442 Milner, A. D., Ganel, T., and Goodale, M. A. (2012). Does grasping in patient d.f. depend on  
443 vision? *Trends in Cognitive Sciences*, 16(5):256–257.
- 444 Mishkin, M. and Ungerleider, L. G. (1982). Contribution of striate inputs to the visuospatial  
445 functions of parieto-preoccipital cortex in monkeys. *Behavioural Brain Research*, 6(1):57–77.
- 446 Mishkin, M., Ungerleider, L. G., and Macko, K. A. (1983). Object vision and spatial vision: two  
447 cortical pathways. *Trends in Neurosciences*, 6:414–417.
- 448 Mumford, D. (1992). On the computational architecture of the neocortex. II. The role of cortico-  
449 cortical loops. *Biological cybernetics*, 66(3):241–51.
- 450 Rao, R. P. N. and Ballard, D. H. (1999). Predictive coding in the visual cortex: a functional  
451 interpretation of some extra-classical receptive-field effects. *Nature Neuroscience*, 2(1):79–87.
- 452 Romanski, L. M., Tian, B., Fritz, J., Mishkin, M., Goldman-Rakic, P. S., and Rauschecker, J. P.  
453 (1999). Dual streams of auditory afferents target multiple domains in the primate prefrontal  
454 cortex. *Nature neuroscience*, 2(12):1131–6.
- 455 Saur, D., Kreher, B. W., Schnell, S., Kummerer, D., Kellmeyer, P., Vry, M.-S., Umarova, R.,

- 456 Musso, M., Glauche, V., Abel, S., Huber, W., Rijntjes, M., Hennig, J., and Weiller, C. (2008).  
457 Ventral and dorsal pathways for language. *Proceedings of the National Academy of Sciences*,  
458 105(46):18035–18040.
- 459 Schenk, T. (2006). An allocentric rather than perceptual deficit in patient D.F. *Nature neuroscience*,  
460 9(11):1369–70.
- 461 Schenk, T. (2012). No dissociation between perception and action in patient DF when haptic  
462 feedback is withdrawn. *The Journal of neuroscience*, 32(6):2013–7.
- 463 Schenk, T. and McIntosh, R. D. (2010). Do we have independent visual streams for perception and  
464 action ? *Cogn neurosci.*, 44(0):1–44.
- 465 van Polanen, V. and Davare, M. (2015). Interactions between dorsal and ventral streams for con-  
466 trolling skilled grasp. *Neuropsychologia*, 79(Pt B):186–91.
- 467 V.H., F. and KR., G. (2008). Grasping visual illusions: consistent data and no dissociation. *Cogn*  
468 *Neuropsychol.*, 25(7-8):920–50.
- 469 Vossel, S., Geng, J. J., and Fink, G. R. (2014). Dorsal and ventral attention systems: distinct neural  
470 circuits but collaborative roles. *The Neuroscientist*, 20(2):150–9.
- 471 Wade, A. R. (2002). The Negative BOLD Signal Unmasked. *Neuron*, 36(6):993–995.
- 472 Whitwell, R. L., Milner, A. D., Cavina-Pratesi, C., Barat, M., and Goodale, M. A. (2015). Patient  
473 df’s visual brain in action: Visual feedforward control in visual form agnosia. *Vision Research*,  
474 110(Pt B):265–276.

## 475 Legends

### 476 Tables

477 **Table 1.** Local Maxima of BOLD activity at Group Level Analysis

478 **Table 2.** Wilcoxon signed rank test: No. of activated and deactivated voxels: Before and After  
479 Practice

480 **Table 3.** Wilcoxon signed rank test: Percentage Signal Change: Before and After Practice

### 481 Figures

482 **Figure 1.** Predictions of brain activation by two models of dual stream theory in different tasks. (a),  
483 (b) During perception of what information (e.g., color perception) both models predict activation of  
484 ventral stream regions but follow different rationale based on input and output level explanations,  
485 respectively. (c), (d) During perception of where information (e.g., perception of position), however,  
486 the predictions of two models diverge. (e),(f) For what information guided action tasks (e.g.,  
487 reaching to a particular color target), though activation of primary visual areas, ventral and dorsal  
488 stream regions, and motor cortex is predicted by both the models, speculation about the flow of  
489 information between these regions is different. Particularly, according to MG model, dorsal stream is  
490 independently capable of processing both what and where information for guiding action in motor  
491 cortex. Thus, though there is flow of information from primary visual cortex to ventral stream  
492 regions, as there is simultaneous internal representation of visual information while performing the  
493 action, the flow from ventral stream to motor cortex is redundant.

494 **Figure 2.** Experimental paradigm. In the perception tasks ((a),(b), and (c)) the participants were  
495 asked to calculate the number of times target stimuli ( red dot, target face, equidistant black dots)  
496 were presented. In action tasks ((d),(e),and (f)) they were instructed to move the cursor in the  
497 screen with the help of a joystick to the target stimuli (red dot, target face, distant black dot)  
498 among two simultaneously presented stimuli in each trial. Each trial was presented for 1 seconds in

499 perception tasks and till the cursor reach the target (unless it is more than 4 seconds) in the action  
500 tasks. Stimuli were presented in active blocks of 24 seconds duration alternating with 16 seconds  
501 rest blocks. Each task run consists of such 16 alternating blocks. Presentation of the tasks for each  
502 participants and presentation of the stimuli within each block were randomized.

503 **Figure 3.** Model space. For each of (a) ventral stream activation, and (b) dorsal stream deactivation  
504 in color and face perception, and (c) dorsal stream and premotor cortex activation in position  
505 perception tasks, two competing models were compared. Primary visual cortex (V1), extrastriate  
506 ventral stream regions (VES), and fusiform gyrus (FG) consisted the regions of interests (ROIs) for  
507 (a), and V1, extrastriate dorsal stream regions (DES), and superior parietal lobule (SPL) consisted  
508 the ROIs for (b). For (c) connections between the SPL and premotor cortex (PMC) were analysed.  
509 For each of (a), and (b), intrinsic connections were assumed between ROIs in immediate hierarchy,  
510 and self loops whereas for (c) all possible intrinsic connections between SPL and PMC, and self-  
511 loops were assumed. Among the two models for (a),(b),and (c) the first model has only modulation  
512 of feedforward connections while the second model also has modulation of feedback connections.  
513 For (d) activation in action tasks connectivity between V1, FG, SPL, and primary motor cortex  
514 (Mot) was considered. We assumed to have no direct intrinsic connection between V1, and Mot,  
515 otherwise all possible connections including self loops were considered. All possible modulation of  
516 non-self connections gave rise to 80 different competing models. For illustration, a full model with  
517 modulation of all non-self connections and another model with modulation of 5 connections were  
518 depicted.

519 **Figure 4.** Behavioural result. Group level Mean and SD of response times in color, face, and  
520 position action tasks across scanning and practice sessions.

521 **Figure 5.** Brain activation and deactivation in perception and action tasks.

522 **Figure 6.** Effective connectivity: (a) Cartoon figures representing general patterns of nature  
523 (positive modulation: red, negative modulation: blue) of modulation of connections (based on  
524 estimated coupling parameters) in color and face, and position perception tasks. The nature of  
525 modulation does not change with practice. (b) Action tasks. Before and after practice. Color of

526 the arrow represents the nature (same as perception tasks), and thickness of the arrow represents  
527 the value of the coupling parameter for modulation of effective connectivity.

## 528 **Extended data**

529 **Table 2-1.** No of voxels activated/deactivated during Perception and Response tasks. V1V2-  
530 primary and secondary visual cortex, VEN-ventral stream, DOR-dorsal stream, PMC-premotor  
531 cortex, MOT-primary motor cortex.

532 **Table 3-1.** Percentage signal change during Perception and Response tasks. V1V2-primary and  
533 secondary visual cortex, VEN-ventral stream, DOR-dorsal stream, PMC-premotor cortex, MOT-  
534 primary motor cortex.

535 **Figure 6-1** Model comparison: Model expected probability of competing models.

536 **Figure 6-2** Coupling parameter estimation in perception tasks



537 **Tables**

Table 1

|                                             | BRAIN REGIONS (Right) | T     | BRAIN REGIONS (Left) | T     |
|---------------------------------------------|-----------------------|-------|----------------------|-------|
| <b>Color Perception: Before Practice</b>    |                       |       |                      |       |
| Activation                                  | LOC                   | 9.15  | V3v                  | 8.35  |
|                                             | V1                    | 7.88  |                      |       |
|                                             | V3v                   | 6.3   |                      |       |
|                                             | FG                    | 9.12  |                      |       |
| Deactivation                                | V2                    | 8.55  | V3v                  | 8.39  |
|                                             | V3v                   | 9.11  | V3d                  | 7.38  |
|                                             | V3d                   | 6.73  | SPL                  | 6.78  |
| <b>Color Perception: After Practice</b>     |                       |       |                      |       |
| Activation                                  | V1                    | 6.67  | V3v                  | 8.04  |
|                                             | V3v                   | 7.18  |                      |       |
| Deactivation                                | V1                    | 7.51  | V1                   | 8.42  |
|                                             | V2                    | 7.21  | V2                   | 7.81  |
|                                             | V3v                   | 7.16  | V3v                  | 6.72  |
|                                             | V3d                   | 7.36  |                      |       |
|                                             | FG                    | 6.21  |                      |       |
| <b>Face Perception: Before Practice</b>     |                       |       |                      |       |
| Activation                                  | V3v                   | 10.7  | V4v                  | 11.62 |
|                                             | V4v                   | 9.09  | LOC                  | 11.85 |
|                                             | FG                    | 12.03 | FG                   | 8.51  |
| Deactivation                                | V1                    | 11.19 | V1                   | 9.49  |
|                                             | V2                    | 11.15 | V3v                  | 15.01 |
|                                             | V3d                   | 11.85 | V3d                  | 9.34  |
|                                             | SPL                   | 8.06  | SPL                  | 7.49  |
|                                             | OP4 [PV]              | 6.17  |                      |       |
| <b>Face Perception: After Practice</b>      |                       |       |                      |       |
| Activation                                  | V3v                   | 14.39 | V3v                  | 11.38 |
|                                             | FG                    | 10.4  | LOC                  | 8.52  |
|                                             |                       |       | FG                   | 9.97  |
| Deactivation                                | V2                    | 11.5  | V3v                  | 10.24 |
|                                             | V3A                   | 11.14 | V3d                  | 7.26  |
|                                             | FG                    | 7.97  | V3A                  | 8.1   |
|                                             |                       |       | FG                   | 7.35  |
| <b>Position Perception: Before Practice</b> |                       |       |                      |       |
| Activation                                  | V4v                   | 7.99  | LOC                  | 6.67  |
|                                             | LOC                   | 7.65  | V5/MT                | 11.18 |
|                                             | FG                    | 12.12 | SPL                  | 11.23 |
|                                             | SPL                   | 11.09 | Area 2               | 9.81  |
|                                             | Area 1                | 9.56  |                      |       |
|                                             | Area 2                | 11.32 |                      |       |
|                                             | Area 44               | 10.82 |                      |       |
|                                             | Lobule VIIb           | 6.87  |                      |       |
| Deactivation                                | V1                    | 9.2   | V3v                  | 6.92  |
|                                             | V2                    | 9.26  | V3d                  | 8.62  |
|                                             | V3v                   | 8.49  |                      |       |
|                                             | V3A                   | 10.76 |                      |       |
|                                             | IPL                   | 7.61  |                      |       |
|                                             | Area TE 1.0           | 8.79  |                      |       |
| <b>Position Perception: After Practice</b>  |                       |       |                      |       |
| Activation                                  | V4v                   | 8.04  | V4v                  | 7.95  |
|                                             | FG                    | 9.34  | SPL                  | 10.54 |
|                                             | IPS                   | 10.59 | Lobule VIIIa (Verm)  | 6.18  |
|                                             | SPL                   | 8.31  |                      |       |
|                                             | Area 2                | 9.46  |                      |       |
|                                             | Area 44               | 7.32  |                      |       |
| Deactivation                                | V1                    | 17.98 | V1                   | 12.74 |
|                                             | V2                    | 12.05 | V2                   | 12.05 |
|                                             | FG4                   | 7.89  | V4v                  | 8.33  |

Table 1: continued

|                                  | BRAIN REGIONS (Right) | T                | BRAIN REGIONS (Left) | T      |
|----------------------------------|-----------------------|------------------|----------------------|--------|
| Color Action: Before Practice    |                       |                  |                      |        |
| Activation                       | V1                    | 9.72             | V3v                  | 12.12  |
|                                  | LOC                   | 8.99             | V4v                  | 10.25  |
|                                  | FG                    | 16.39            | FG                   | 14     |
|                                  | SPL                   | 11.95            | SPL                  | 11.23  |
|                                  | Lobule VI (Hem)       | 11.75            | 4a                   | 10.14  |
| Color Action : After Practice    |                       |                  |                      |        |
| Activation                       | V1                    | 14.69            | V1                   | 10.62  |
|                                  | IPS                   | 8.63             | V3v                  | 11.04  |
|                                  | SPL                   | 8.6              | V5/MT                | 10.69  |
|                                  | Lobule V (Hem)        | 14.21            | FG                   | 12.93  |
|                                  | Lobule VI (Hem)       | 14.16            | SPL                  | 0 8.94 |
|                                  |                       |                  | 4a                   | 12.51  |
|                                  |                       |                  | 4p                   | 13.74  |
|                                  |                       | Thal: Prefrontal | 8.74                 |        |
| Face Action: Before Practice     |                       |                  |                      |        |
| Activation                       | V3v                   | 13.55            | LOC                  | 15.38  |
|                                  | V4v                   | 14.69            | FG                   | 14.58  |
|                                  | LOC                   | 14.87            | SPL                  | 13.94  |
|                                  | FG                    | 13.24            | 4p                   | 14.2   |
|                                  | IPS                   | 13.2             | Thal: Prefrontal     | 8.29   |
|                                  | Lobule VI (Hem)       | 13.58            |                      |        |
|                                  | Thal: Prefrontal      | 7.69             |                      |        |
| Face Action : After Practice     |                       |                  |                      |        |
| Activation                       | V1                    | 10.35            | V3d                  | 6.33   |
|                                  | V2                    | 10.43            | V5/MT                | 10.04  |
|                                  | V3v                   | 10.64            | LOC                  | 17.66  |
|                                  | IPS                   | 10.13            | 4a                   | 17.29  |
|                                  | SPL                   | 7.43             | Lobule VI (Hem)      | 15.94  |
|                                  | Lobule VI (Hem)       | 14.2             | Thal: Prefrontal     | 10.08  |
|                                  |                       |                  |                      |        |
| Position Action: Before Practice |                       |                  |                      |        |
| Activation                       | V1                    | 13.11            | V4v                  | 12.73  |
|                                  | FG                    | 14.66            | SPL                  | 15.11  |
|                                  | IPL                   | 6.13             | 4a                   | 12.03  |
|                                  | Area 2                | 12.21            | Lobule VI (Hem)      | 11.99  |
|                                  | Area 44               | 7.85             | Thal: Prefrontal     | 6.55   |
|                                  | Lobule VI (Hem)       | 12.04            | Thal: Parietal       | 6.1    |
| Position Action : After Practice |                       |                  |                      |        |
| Activation                       | V1                    | 10.83            | LOC                  | 11.05  |
|                                  | V2                    | 9.77             | V5/MT                | 10.34  |
|                                  | SPL                   | 11.03            | SPL                  | 13.43  |
|                                  | Area 2                | 8.16             | Area 1               | 8.42   |
|                                  | Area 44               | 8.63             | Lobule VI (Hem)      | 14.34  |
|                                  | Lobule VI (Hem)       | 13.67            | Thal: Prefrontal     | 8.2    |
|                                  | Thal: Prefrontal      | 6.18             | Thal: Motor          | 6.53   |
|                                  |                       |                  |                      |        |

Table 2

| Left Hemisphere   |                         |                     |                |                  |               |               |
|-------------------|-------------------------|---------------------|----------------|------------------|---------------|---------------|
|                   | Activation/ Dactivation | Task                | BRAIN REGIONS  | p                |               |               |
| Perception        | Activation              | Color Perception    | V1V2           | 0.1437           |               |               |
|                   |                         |                     | Ven            | <i>0.0303</i>    |               |               |
|                   |                         | Face Perception     | V1V2           | 0.9036           |               |               |
|                   |                         |                     | Ven            | 0.0543           |               |               |
|                   |                         | Position Perception | V1V2           | 0.1914           |               |               |
|                   |                         |                     | Ven            | <i>0.0032</i>    |               |               |
|                   | Dactivation             | Color Perception    | V1V2           | 0.7403           |               |               |
|                   |                         |                     | Dor            | 0.6981           |               |               |
|                   |                         | Face Perception     | V1V2           | 0.0929           |               |               |
|                   |                         |                     | Dor            | <i>0.0382</i>    |               |               |
|                   |                         | Position Perception | V1V2           | 0.1840           |               |               |
|                   |                         |                     | Dor            | 0.1774           |               |               |
| Response          | Activation              | Color Response      | V1V2           | 0.6813           |               |               |
|                   |                         |                     | Ven            | 0.5379           |               |               |
|                   |                         |                     | Dor            | 0.2110           |               |               |
|                   |                         | Face Response       | Mot            | 0.8089           |               |               |
|                   |                         |                     | V1V2           | 0.3905           |               |               |
|                   |                         |                     | Ven            | 0.0702           |               |               |
|                   |                         | Position Response   | Dor            | <i>0.0438</i>    |               |               |
|                   |                         |                     | Mot            | 0.6009           |               |               |
|                   |                         |                     | V1V2           | 0.2110           |               |               |
|                   |                         | Dactivation         | Color Response | Ven              | 0.2470        |               |
|                   |                         |                     |                | Dor              | 0.4897        |               |
|                   |                         |                     | Face Response  | Dor              | 0.4897        |               |
|                   | Mot                     |                     |                | 0.9198           |               |               |
|                   | Right Hemisphere        |                     | Activation     | Color Perception | V1V2          | <i>0.0084</i> |
|                   |                         |                     |                |                  | Ven           | <i>0.0222</i> |
|                   |                         | Face Perception     |                | V1V2             | 0.2348        |               |
|                   |                         |                     |                | Ven              | 0.1124        |               |
|                   |                         | Position Perception |                | V1V2             | 0.9065        |               |
| Ven               |                         |                     |                | <i>0.0045</i>    |               |               |
| Dactivation       |                         | Color Perception    |                | Dor              | <i>0.0090</i> |               |
|                   |                         |                     |                | PMC              | <i>0.0008</i> |               |
|                   |                         | Face Perception     |                | V1V2             | 0.7403        |               |
|                   |                         |                     |                | Dor              | 0.8129        |               |
|                   |                         | Position Perception |                | V1V2             | 0.0793        |               |
|                   |                         |                     |                | Dor              | <i>0.0169</i> |               |
| Response          |                         | Activation          | Color Response | V1V2             | 0.1386        |               |
|                   |                         |                     |                | Dor              | 0.1588        |               |
|                   |                         |                     | Ven            | 0.9256           |               |               |
|                   |                         | Face Response       | Dor            | <i>0.0057</i>    |               |               |
|                   |                         |                     | Mot            | 0.5089           |               |               |
|                   |                         |                     | V1V2           | 0.5016           |               |               |
| Dactivation       | Color Response          | Ven                 | <i>0.0064</i>  |                  |               |               |
|                   |                         | Dor                 | <i>0.0014</i>  |                  |               |               |
|                   | Face Response           | Mot                 | 0.6009         |                  |               |               |
|                   |                         | V1V2                | 0.2789         |                  |               |               |
|                   | Position Response       | Ven                 | <i>0.0290</i>  |                  |               |               |
|                   |                         | Dor                 | <i>0.0438</i>  |                  |               |               |
| Position Response | Mot                     | 0.6009              |                |                  |               |               |
|                   | Mot                     | 0.9198              |                |                  |               |               |

Table 3

| Left Hemisphere |                         |                     |               |                   |            |               |
|-----------------|-------------------------|---------------------|---------------|-------------------|------------|---------------|
|                 | Activation/ Dactivation | Task                | BRAIN REGIONS | p                 |            |               |
| Perception      | Activation              | Color Perception    | V1V2          | 0.2959            |            |               |
|                 |                         |                     | <i>Ven</i>    | <i>0.0045</i>     |            |               |
|                 |                         | Face Perception     | V1V2          | 0.2471            |            |               |
| Perception      | Deactivation            | Color Perception    | <i>Ven</i>    | 0.3317            |            |               |
|                 |                         |                     | <i>Ven</i>    | 0.1790            |            |               |
|                 |                         | Position Perception | <i>Dor</i>    | <i>0.0111</i>     |            |               |
|                 |                         |                     | <i>PMC</i>    | <i>0.0045</i>     |            |               |
|                 |                         |                     | V1V2          | 0.6813            |            |               |
| Perception      | Deactivation            | Face Perception     | <i>Dor</i>    | 0.3905            |            |               |
|                 |                         |                     | V1V2          | 0.0930            |            |               |
|                 |                         | Position Perception | <i>Dor</i>    | 0.3703            |            |               |
| Response        | Activation              | Color Response      | V1V2          | 0.1672            |            |               |
|                 |                         |                     | <i>Dor</i>    | 0.2959            |            |               |
|                 |                         | Face Response       | V1V2          | 0.7089            |            |               |
|                 |                         |                     | <i>Ven</i>    | 0.2322            |            |               |
|                 |                         |                     | <i>Dor</i>    | 0.1913            |            |               |
|                 |                         |                     | <i>Mot</i>    | 0.5503            |            |               |
|                 |                         |                     | V1V2          | 0.3135            |            |               |
|                 |                         | Response            | Activation    | Position Response | <i>Ven</i> | <i>0.0333</i> |
|                 |                         |                     |               |                   | <i>Dor</i> | 0.1354        |
|                 |                         |                     |               | Position Response | <i>Mot</i> | 0.9405        |
|                 |                         |                     |               |                   | V1V2       | 0.2180        |
|                 |                         | <i>Ven</i>          | 0.1005        |                   |            |               |
|                 |                         | <i>Dor</i>          | 0.4553        |                   |            |               |
|                 |                         | <i>Mot</i>          | 0.7369        |                   |            |               |

  

| Right Hemisphere |                         |                     |               |                     |            |               |
|------------------|-------------------------|---------------------|---------------|---------------------|------------|---------------|
|                  | Activation/ Dactivation | Task                | BRAIN REGIONS | p                   |            |               |
| Perception       | Activation              | Color Perception    | V1V2          | 0.8813              |            |               |
|                  |                         |                     | <i>Ven</i>    | 0.2627              |            |               |
|                  |                         | Face Perception     | V1V2          | 0.8228              |            |               |
|                  |                         |                     | <i>Ven</i>    | 0.2043              |            |               |
|                  |                         | Perception          | Deactivation  | Position Perception | <i>Ven</i> | 0.2180        |
| <i>Dor</i>       | <i>0.0276</i>           |                     |               |                     |            |               |
| <i>PMC</i>       | <i>0.0124</i>           |                     |               |                     |            |               |
| Perception       | Deactivation            | Color Perception    | V1V2          | 0.5755              |            |               |
|                  |                         |                     | <i>Dor</i>    | 0.9405              |            |               |
|                  |                         | Face Perception     | V1V2          | 0.0793              |            |               |
|                  |                         |                     | <i>Dor</i>    | 0.9405              |            |               |
|                  |                         | Position Perception | V1V2          | 0.6274              |            |               |
| Response         | Activation              | Color Response      | <i>Dor</i>    | <i>0.0169</i>       |            |               |
|                  |                         |                     | V1V2          | 0.4553              |            |               |
|                  |                         |                     | <i>Ven</i>    | <i>0.0366</i>       |            |               |
|                  |                         | Face Response       | <i>Dor</i>    | 0.0930              |            |               |
|                  |                         |                     | <i>Mot</i>    | 0.5503              |            |               |
|                  |                         |                     | V1V2          | 0.3507              |            |               |
|                  |                         |                     | <i>Ven</i>    | <i>0.0400</i>       |            |               |
|                  |                         |                     | <i>Dor</i>    | <i>0.0152</i>       |            |               |
|                  |                         | Response            | Activation    | Position Response   | <i>Mot</i> | 0.9405        |
|                  |                         |                     |               |                     | V1V2       | 0.0859        |
|                  |                         |                     |               | Position Response   | <i>Ven</i> | <i>0.0111</i> |
| <i>Dor</i>       | 0.0859                  |                     |               |                     |            |               |
|                  |                         | <i>Mot</i>          | 0.7369        |                     |            |               |

538 **Figures**

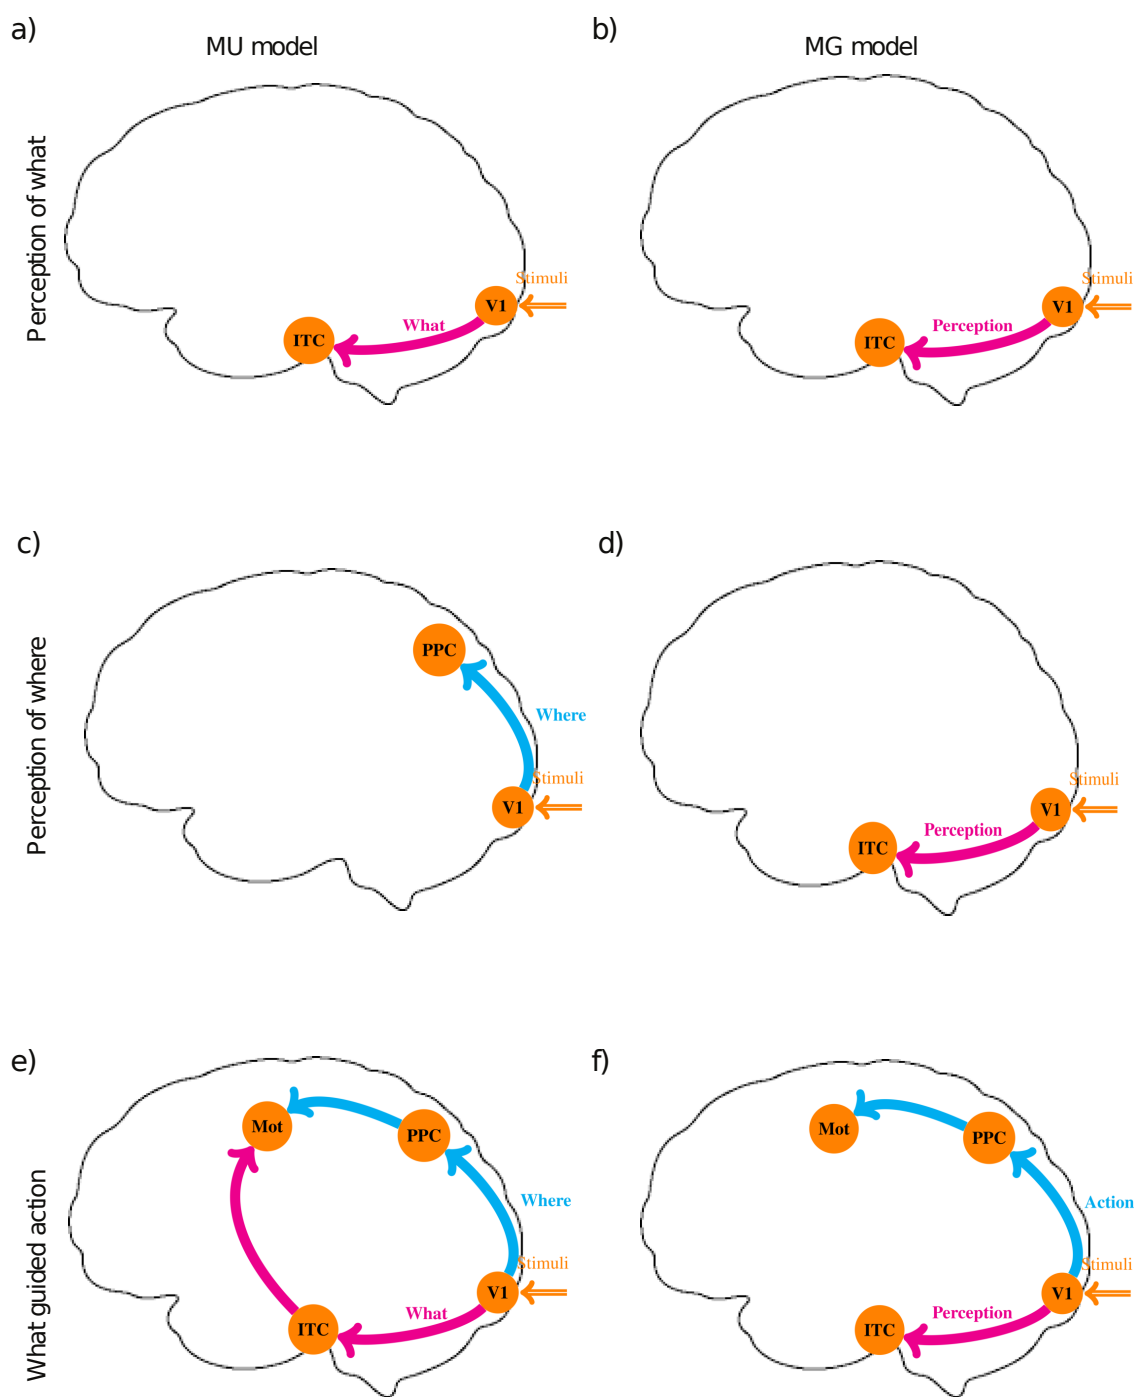

Figure 1

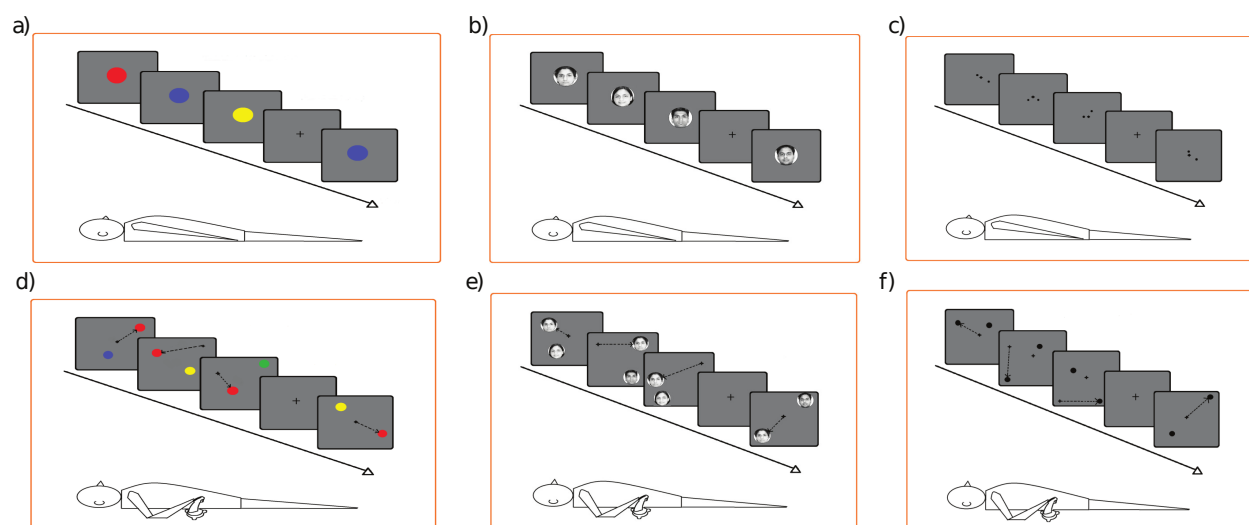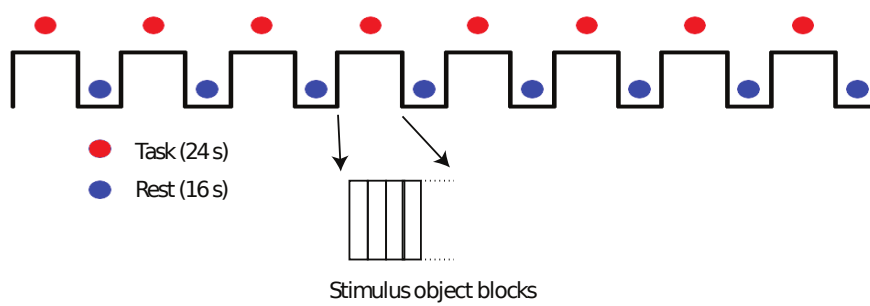

Figure 2

a) Activation model: Color, face perception

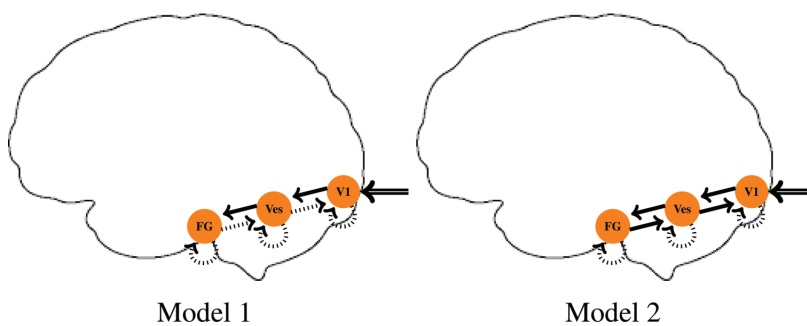

b) Deactivation model: Color, face perception

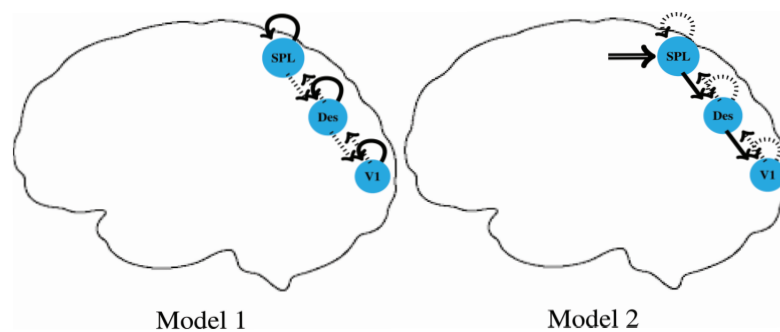

c) Activation model: Position perception

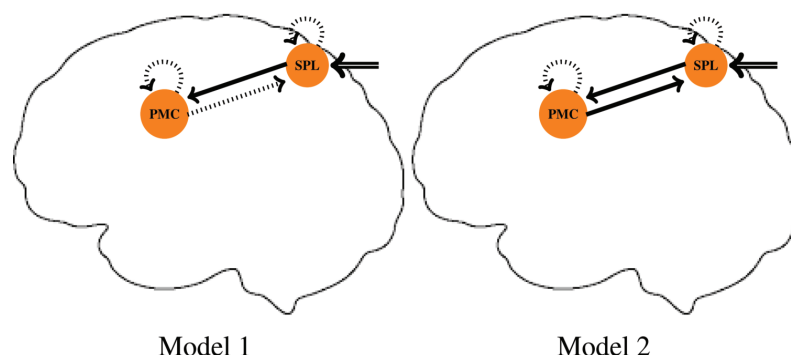

d) Activation model: Color, face, position action

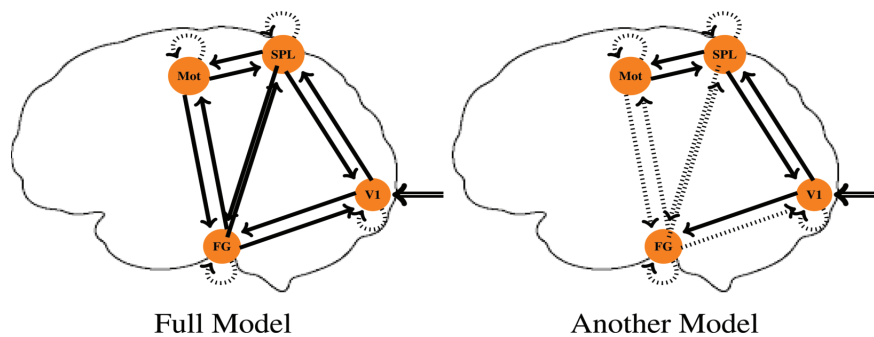

Figure 3

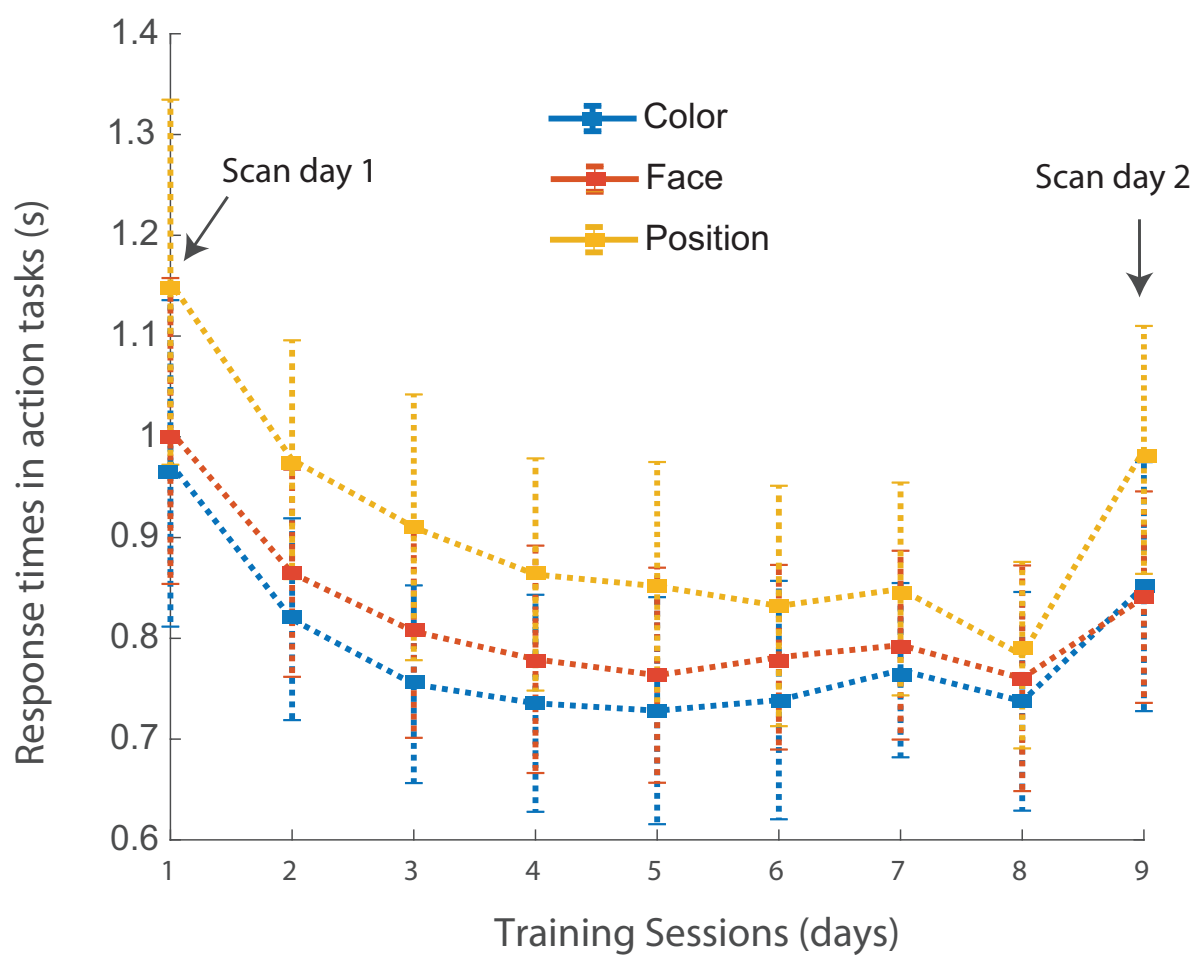

Figure 4



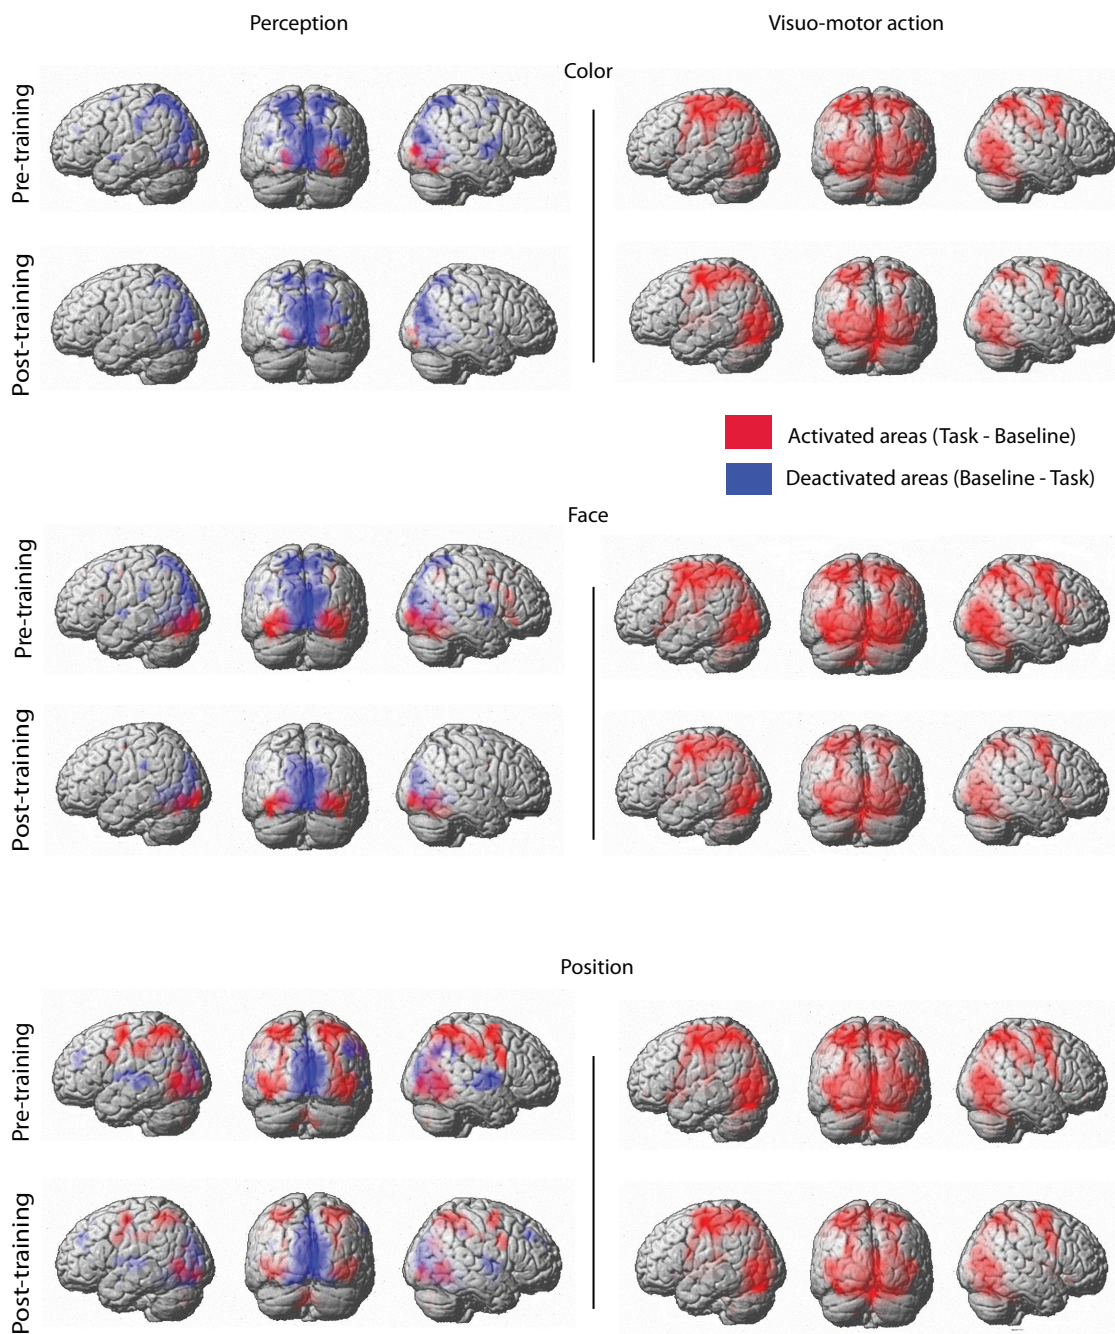

Figure 5

a) Perception tasks

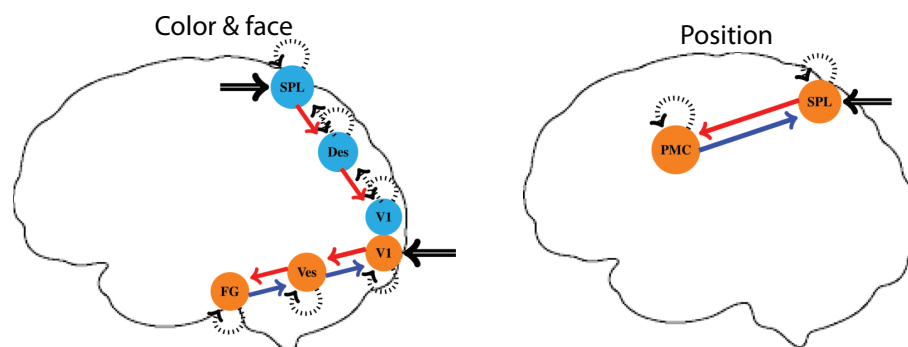

b) Visuo-motor action tasks

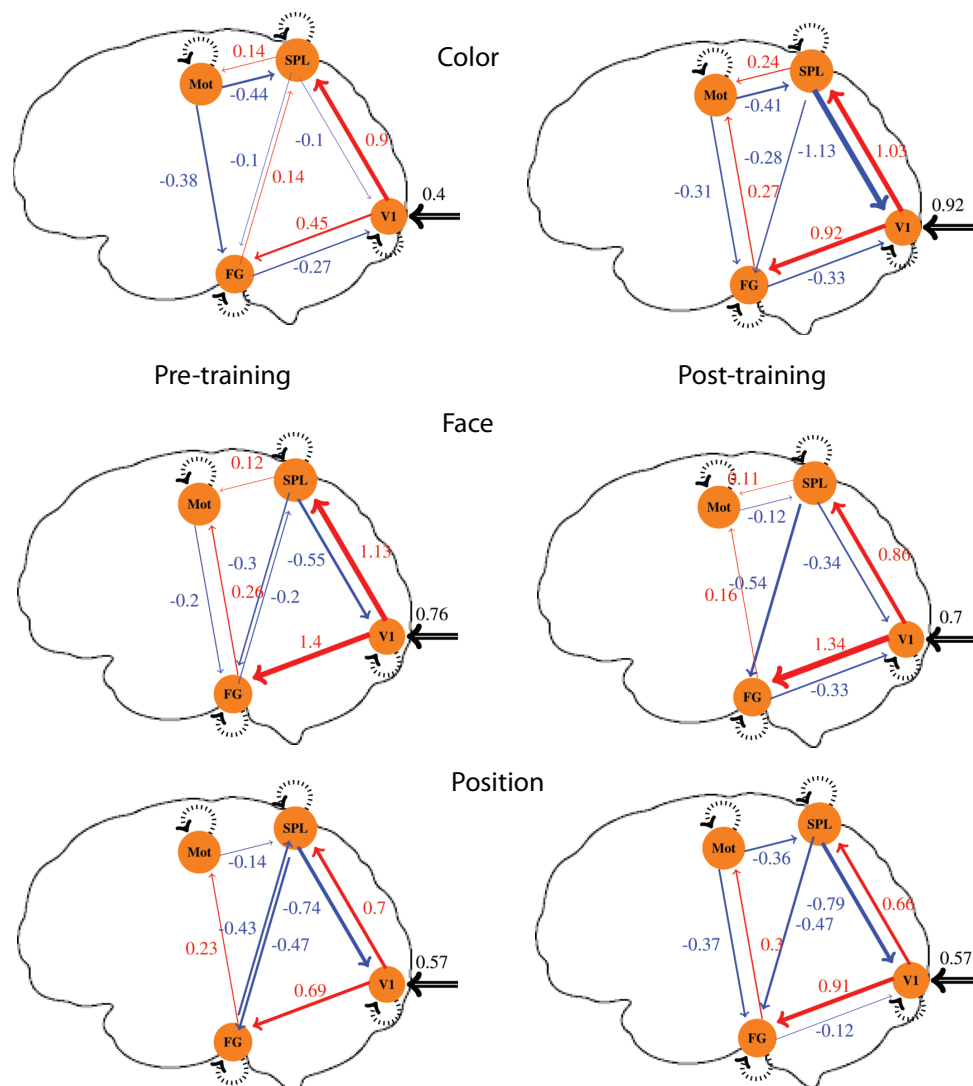

Figure 6
